# Supplementary material
Source: PubMed Central journal article supplement (PMC3962013)
Supplement: NIHMS562608-supplement-01.pdf [file NIHMS562608-supplement-01.pdf]

Table S1. Summary of Affinity Measurements by Isothermal Titration Calorimetry and Surface Plasmon Resonance, Related to Figures 1 and 2

| <i>By ITC</i> |             | $K_D$ (M)                                     | <i>N</i>        | $\Delta H$ (kcal/mol) |
|---------------|-------------|-----------------------------------------------|-----------------|-----------------------|
| SYG-1 D1      | SYG-2 D1-D4 | $6.02 \times 10^{-7} \pm 1.62 \times 10^{-7}$ | $0.80 \pm 0.04$ | $-12.76 \pm 1.47$     |
| SYG-1 ECD     | SYG-2 ECD   | $6.69 \times 10^{-7} \pm 3.78 \times 10^{-7}$ | $0.82 \pm 0.14$ | $-7.90 \pm 0.33$      |
| <i>By SPR</i> |             | $K_D$ (M)                                     |                 |                       |
| SYG-1 ECD     | SYG-2 D1-D4 | $7.5 \times 10^{-7}$                          |                 |                       |
| SYG-1 D1      | SYG-2 ECD   | $5.9 \times 10^{-7} \pm 0.4 \times 10^{-7}$   |                 |                       |
| SYG-1 ECD     | SYG-2 ECD   | $7.6 \times 10^{-7} \pm 3.1 \times 10^{-7}$   |                 |                       |
| Rst D1D2      | SNS ECD     | $2.8 \times 10^{-6}$                          |                 |                       |
| Rst D1        | SNS ECD     | $2.2 \times 10^{-6}$                          |                 |                       |
| Rst ECD       | SNS ECD     | $3.5 \times 10^{-6}$                          |                 |                       |
| Rst D1D2      | Hbs ECD     | $1.2 \times 10^{-6}$                          |                 |                       |
| Rst D1        | Hbs ECD     | $1.1 \times 10^{-6}$                          |                 |                       |
| Rst ECD       | Hbs ECD     | $1.3 \times 10^{-6}$                          |                 |                       |
| Duf ECD       | SNS ECD     | $2.5 \times 10^{-6}$                          |                 |                       |
| Duf ECD       | Hbs ECD     | $3.4 \times 10^{-6}$                          |                 |                       |
| Rst D1D2      | Rst ECD     | $\sim 7 \times 10^{-4}$                       |                 |                       |

Reported errors are standard deviations calculated from two to four replicates.

Table S2. Data and Refinement Statistics for X-Ray Crystallography, Related to Figures 1 and 2

|                                     | Refolded<br>Se-Met<br>SYG-1 D1D2 | Glycosylated<br>SYG-1 D1D2 | Glycosylated<br>SYG-1 D1         | Glycosylated<br>SYG-1 D1,<br>2 <sup>nd</sup> form | Rst D1D2                | mmNeph1<br>D1D2           | Duf D1                 | SYG-1/SYG-<br>2 D1D2/D1-<br>D4 N391C | SYG-2 D4               | SYG-2 D3D4                       |
|-------------------------------------|----------------------------------|----------------------------|----------------------------------|---------------------------------------------------|-------------------------|---------------------------|------------------------|--------------------------------------|------------------------|----------------------------------|
| <b>Data Collection</b>              |                                  |                            |                                  |                                                   |                         |                           |                        |                                      |                        |                                  |
| Space Group                         | C2                               | P3 <sub>2</sub> 21         | P4 <sub>2</sub> 2 <sub>1</sub> 2 | I4 <sub>1</sub> 22                                | P2 <sub>1</sub>         | C222 <sub>1</sub>         | P2 <sub>1</sub>        | C2                                   | C2                     | P4 <sub>3</sub> 2 <sub>1</sub> 2 |
| Cell Dimensions                     |                                  |                            |                                  |                                                   |                         |                           |                        |                                      |                        |                                  |
| <i>a</i> , <i>b</i> , <i>c</i> (Å)  | 86.54, 32.07,<br>102.23          | 92.65, 92.65,<br>129.01    | 84.81, 84.81,<br>74.13           | 129.18, 129.18,<br>141.49                         | 59.94, 77.94,<br>121.10 | 118.96, 120.01,<br>119.91 | 74.33, 84.36,<br>82.63 | 286.79,<br>116.14, 98.03             | 61.81, 54.13,<br>63.62 | 121.24, 121.24,<br>178.16        |
| <i>α</i> , <i>β</i> , <i>γ</i> (°)  | 90, 113.84, 90                   | 90, 90, 120                | 90, 90, 90                       | 90, 90, 90                                        | 90, 95.44, 90           | 90, 90, 90                | 90, 115.27, 90         | 90, 107.62, 90                       | 90, 104.61, 90         | 90, 90, 90                       |
| Resolution (Å)                      | 50-2.30<br>(2.38-2.30)           | 50-2.50<br>(2.59-2.50)     | 50-1.70<br>(1.76-1.70)           | 50-2.10<br>(2.18-2.10)                            | 50-1.90<br>(1.93-1.90)  | 50-3.95<br>(4.09-3.95)    | 50-2.30<br>(2.34-2.30) | 50-3.30<br>(3.42-3.30)               | 50-1.80<br>(1.83-1.80) | 50-3.0<br>(3.08-3.0)**           |
| <i>R</i> <sub>sym</sub> (%)         | 5.3 (23.1)*                      | 5.7 (80.7)                 | 6.4 (68.2)                       | 7.1 (49.5)                                        | 6.6 (32.8)              | 9.2 (88.5)                | 10.6 (60.8)            | 9.8 (57.5)                           | 5.1 (51.3)             | 15.8 (>100)**                    |
| < <i>I</i> >/<σ( <i>I</i> )>        | 19.3 (2.3)*                      | 25.1 (2.4)                 | 32.8 (2.3)                       | 25.6 (2.6)                                        | 16.2 (2.3)              | 18.9 (1.8)                | 12.7 (2.2)             | 13.4 (1.7)                           | 24.3 (2.6)             | 13.15 (0.8)**                    |
| Completeness (%)                    | 90.7 (41.3)*                     | 99.6 (100.0)               | 99.5 (95.4)                      | 98.0 (85.1)                                       | 88.0 (50.2)             | 99.7 (98.1)               | 100 (100)              | 95.9 (77.7)                          | 100 (100)              | 99.9 (100.0)                     |
| Redundancy                          | 3.5 (1.5)*                       | 7.0 (6.6)                  | 12.7 (7.2)                       | 8.3 (3.8)                                         | 3.4 (2.1)               | 7.0 (6.4)                 | 3.8 (3.7)              | 3.7 (3.1)                            | 3.8 (3.7)              | 18.4 (18.6)                      |
| <b>Refinement</b>                   |                                  |                            |                                  |                                                   |                         |                           |                        |                                      |                        |                                  |
| Resolution (Å)                      | 50-2.30<br>(2.40-2.30)           | 50-2.50<br>(2.61-2.50)     | 50-1.70<br>(1.75-1.70)           | 50-2.10<br>(2.16-2.10)                            | 50-1.90 (1.93-<br>1.90) | 50-3.94<br>(4.50-3.94)    | 50-2.30<br>(2.35-2.30) | 50-3.29<br>(3.36-3.29)               | 50-1.80<br>(1.90-1.80) | 50-3.0<br>(3.11-3.0)             |
| Reflections                         | 11098                            | 22690                      | 30345                            | 34491                                             | 77176                   | 7856                      | 41179                  | 44580                                | 18854                  | 27288                            |
| <i>R</i> <sub>cryst</sub> (%)       | 20.08 (21.66)                    | 19.63 (27.55)              | 17.48 (24.40)                    | 20.17 (25.41)                                     | 17.57 (22.26)           | 29.13 (31.16)             | 19.17 (25.89)          | 25.87 (37.53)                        | 19.13 (23.82)          | 24.18 (32.21)                    |
| <i>R</i> <sub>free</sub> (%)        | 24.54 (24.54)                    | 25.25 (35.71)              | 20.58 (28.65)                    | 22.76 (27.34)                                     | 21.10 (29.06)           | 32.79 (32.65)             | 24.33 (33.99)          | 30.61 (41.60)                        | 21.06 (23.80)          | 28.34 (36.54)                    |
| Number of atoms                     |                                  |                            |                                  |                                                   |                         |                           |                        |                                      |                        |                                  |
| Protein                             | 1800                             | 3550                       | 2081                             | 3394                                              | 6565                    | 2940                      | 6548                   | 14404                                | 1588                   | 5948                             |
| Ligand                              | 0                                | 125                        | 74                               | 62                                                | 52                      | 67                        | 116                    | 401                                  | 42                     | 84                               |
| Water                               | 34                               | 39                         | 273                              | 347                                               | 787                     | 0                         | 328                    | 0                                    | 143                    | 0                                |
| Average B-factors (Å <sup>2</sup> ) |                                  |                            |                                  |                                                   |                         |                           |                        |                                      |                        |                                  |
| All                                 | 72.9                             | 81.3                       | 28.2                             | 49.3                                              | 46.8                    | 184.2                     | 39.9                   | 95.5                                 | 33.0                   | 148.0                            |
| Protein                             | 73.4                             | 80.2                       | 25.5                             | 49.1                                              | 46.9                    | 183.5                     | 39.6                   | 94.7                                 | 31.9                   | 148.1                            |
| Solvent                             | 48.5                             | 65.3                       | 35.3                             | 46.1                                              | 44.9                    | N/A                       | 35.7                   | N/A                                  | 38.6                   | N/A                              |
| R.m.s. deviations from ideality     |                                  |                            |                                  |                                                   |                         |                           |                        |                                      |                        |                                  |
| Bond Lengths (Å)                    | 0.005                            | 0.007                      | 0.011                            | 0.005                                             | 0.009                   | 0.004                     | 0.008                  | 0.004                                | 0.005                  | 0.006                            |
| Bond Angles (°)                     | 0.808                            | 1.076                      | 1.327                            | 0.942                                             | 1.122                   | 0.805                     | 0.716                  | 0.994                                | 1.044                  | 1.055                            |

\* These statistics are for Friedel's pairs not merged, for data collected only at the Se peak wavelength.

\*\* The *CC*<sub>1/2</sub> value for the highest resolution bin is 32.4%.
